# Supplementary material for: Gastroenteritis due to typhoidal Salmonella: a decade of observation at an urban and a rural diarrheal disease hospital in Bangladesh
Source: PubMed Central journal article supplement (PMC4132926; doi:10.1186/1471-2334-14-435), 2014-08-07

Monthly cases of Typhoidal *Salmonella* in Dhaka and Matlab (2000-2012)

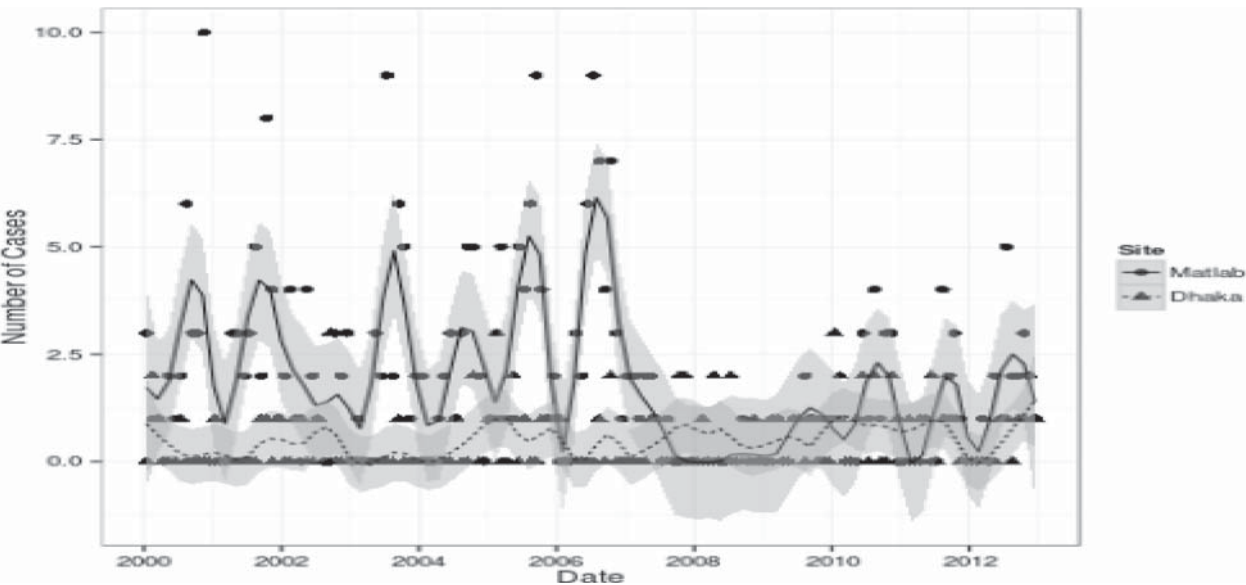

Seasonal distribution of Typhoidal *Salmonella* in Dhaka and Matlab (2000-2012)

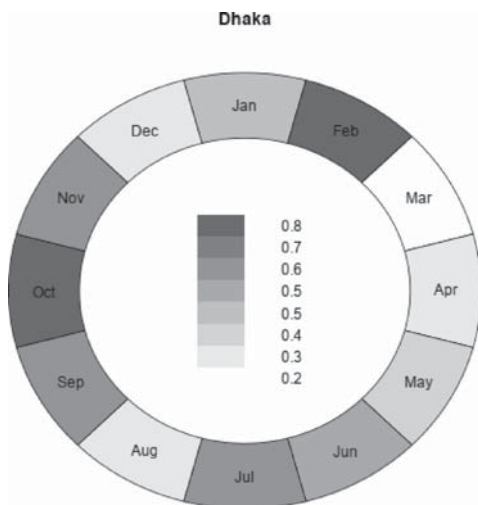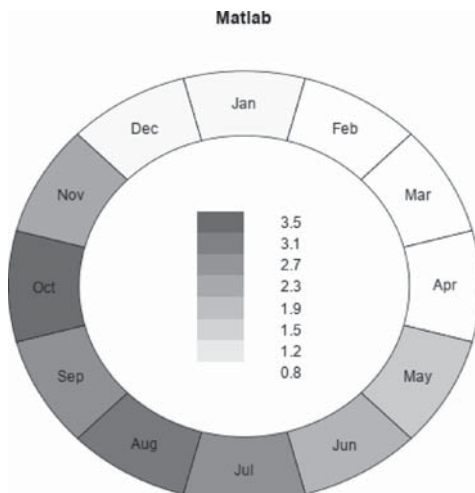

Supplement: 12879_2013_3733_MOESM1_ESM.pdf [file 12879_2013_3733_MOESM1_ESM.pdf]
